# Supplementary material
Source: publisher figshare collection journal article supplement (https://karger.figshare.com/articles/dataset/_/4047549)
Supplement: Supplementary file 1 [file 1]

# Brain arousal regulation in carriers of bipolar disorder risk alleles

Philippe Jawinski<sup>1,2,3</sup>, Christian Sander<sup>1,2,3</sup>, Nicole Mauche<sup>1,2</sup>, Janek Spada<sup>2,3</sup>, Jue Huang<sup>2</sup>, Anna Schmidt<sup>1,2</sup>, Madlen Häntzsch<sup>1,4</sup>, Ralph Burkhardt<sup>1,4</sup>, Markus Scholz<sup>1,5</sup>, Ulrich Hegerl<sup>1,2,3</sup>, Tilman Hensch<sup>1,2</sup>

<sup>1</sup> LIFE – Leipzig Research Center for Civilization Diseases, University of Leipzig, Germany

<sup>2</sup> Department of Psychiatry and Psychotherapy, University of Leipzig, Germany

<sup>3</sup> Depression Research Centre of the German Depression Foundation, Leipzig, Germany

<sup>4</sup> Institute of Laboratory Medicine, Clinical Chemistry and Molecular Diagnostics, University Hospital Leipzig, Germany

<sup>5</sup> Institute for Medical Informatics, Statistics and Epidemiology, University of Leipzig, Germany

**Table S2** Replication Sample: BD genotypes and repeated-measures ANCOVA results for vigilance regulation

| Chr | Locus    | Gene <sup>a</sup> | SNP       | Minor allele (A) | OR from literature for minor allele | OR Reference           | Genotyping |                 |      |      | Genotype frequencies AA/AB/BB | Genotype main effect   |            |          | Genotype x time on task |            |          |
|-----|----------|-------------------|-----------|------------------|-------------------------------------|------------------------|------------|-----------------|------|------|-------------------------------|------------------------|------------|----------|-------------------------|------------|----------|
|     |          |                   |           |                  |                                     |                        | IS         | CR <sup>b</sup> | MAF  | HWE  |                               | <i>F</i> ( <i>df</i> ) | $\eta_p^2$ | <i>p</i> | <i>F</i> ( <i>df</i> )  | $\eta_p^2$ | <i>p</i> |
| 1   | 1p32.1   | NF1A              | rs472913  | C                | 1.18                                | Scott et al. (2009)    | .999       | .994            | .429 | .865 | 94/246/166                    | 0.140 (2,500)          | .001       | .870     | 0.735 (5,6,1408,4)      | .003       | .613     |
| 12  | 12p13.33 | CACNA1C           | rs1006737 | A                | 1.18                                | Ferreira et al. (2008) | 1 (typed)  | 1               | .321 | .188 | 59/209/241                    | 0.316 (2,503)          | .001       | .729     | 1.001 (5,6,1418,4)      | .004       | .421     |

Chr Chromosome, SNP Single Nucleotide Polymorphism, OR Odds Ratio, IS IMPUTE2 info-score, CR call rate, MAF minor allele frequency, HWE *p*-value Hardy-Weinberg Equilibrium, NF1A nuclear factor 1 A-type, CACNA1C alpha-1C subunit of the L-type voltage-gated calcium channel

Covariates: sex, age, daytime of EEG-assessment

<sup>a</sup> Most relevant gene listed

<sup>b</sup> Considering a posterior probability of best guess genotype  $\geq .995$
